# Supplementary material for: Pregnancy Complications Following Prenatal Exposure to SSRIs or Maternal Psychiatric Disorders: Results From Population-Based National Register Data
Source: Atypon-hosted journal article supplement (doi:10.1176/appi.ajp.2015.14121575), 2015-08-04

**TABLE S1.** Association of covariates to the outcome variables under study.

| Covariate associated with exposure at P<0.1       | Outcome                    |                   |                                        |                  |                  |                    |                           |                  |                             |                                                  |                                |                       |                  |
|---------------------------------------------------|----------------------------|-------------------|----------------------------------------|------------------|------------------|--------------------|---------------------------|------------------|-----------------------------|--------------------------------------------------|--------------------------------|-----------------------|------------------|
|                                                   | Hyper-tension of pregnancy | Caesarean section | Caesarean section, emergency or urgent | Bleeding         | Preterm birth    | Very preterm birth | Small for gestational age | Apgar 5 min <7   | Neonatal breathing problems | Persistent pulmonary hypertension of the newborn | Neonatal (intensive) care unit | In hospital at 7 days | Malformation     |
|                                                   | <i>P</i> -value            |                   |                                        |                  |                  |                    |                           |                  |                             |                                                  |                                |                       |                  |
| Maternal age                                      | <b>&lt;0.001</b>           | <b>&lt;0.001</b>  | <b>&lt;0.001</b>                       | <b>0.09</b>      | <b>0.01</b>      | <b>0.09</b>        | <b>&lt;0.001</b>          | 0.11             | 0.15                        | 0.74                                             | <b>&lt;0.001</b>               | <b>0.03</b>           | 0.15             |
| Residence                                         | 0.69                       | <b>0.01</b>       | <b>&lt;0.001</b>                       | 0.83             | <b>0.04</b>      | 0.77               | <b>0.002</b>              | 0.33             | 0.29                        | 0.60                                             | 0.24                           | <b>0.05</b>           | 0.64             |
| Marital status                                    | <b>0.02</b>                | 0.78              | <b>0.04</b>                            | 0.75             | <b>0.07</b>      | 0.21               | <b>0.003</b>              | 0.83             | 0.91                        | 1.00                                             | <b>0.002</b>                   | <b>0.07</b>           | 0.11             |
| Parity                                            | <b>&lt;0.001</b>           | <b>&lt;0.001</b>  | <b>&lt;0.001</b>                       | <b>&lt;0.001</b> | <b>&lt;0.001</b> | <b>0.01</b>        | <b>&lt;0.001</b>          | <b>&lt;0.001</b> | <b>&lt;0.001</b>            | 0.25                                             | <b>&lt;0.001</b>               | <b>&lt;0.001</b>      | 0.17             |
| Smoking during pregnancy                          | 0.25                       | <b>0.05</b>       | <b>0.002</b>                           | 0.90             | <b>0.02</b>      | <b>0.005</b>       | <b>&lt;0.001</b>          | 0.70             | 0.83                        | <b>0.09</b>                                      | <b>0.09</b>                    | <b>0.006</b>          | 0.68             |
| Socio-economic status                             | <b>0.002</b>               | <b>&lt;0.001</b>  | <b>&lt;0.001</b>                       | 0.47             | <b>0.08</b>      | 0.83               | <b>0.09</b>               | 0.24             | 0.12                        | 0.42                                             | 0.48                           | <b>0.02</b>           | 0.10             |
| Purchases of other psychiatric drugs <sup>1</sup> | 0.89                       | <b>&lt;0.001</b>  | <b>&lt;0.001</b>                       | 0.28             | 0.63             | <b>0.08</b>        | 0.20                      | 0.15             | 0.64                        | 1.00                                             | <b>0.007</b>                   | <b>0.01</b>           | 0.76             |
| Pre-pregnancy diabetes                            | <b>&lt;0.001</b>           | <b>&lt;0.001</b>  | <b>&lt;0.001</b>                       | 0.14             | <b>&lt;0.001</b> | <b>0.02</b>        | 0.78                      | 0.45             | <b>&lt;0.001</b>            | <b>0.09</b>                                      | <b>&lt;0.001</b>               | <b>&lt;0.001</b>      | <b>&lt;0.001</b> |

(Continued)

|                                                    |                  |                  |                  |      |              |      |                  |             |             |      |                  |                  |             |
|----------------------------------------------------|------------------|------------------|------------------|------|--------------|------|------------------|-------------|-------------|------|------------------|------------------|-------------|
| Entitlement to other chronic diseases <sup>2</sup> | <b>&lt;0.001</b> | <b>&lt;0.001</b> | <b>0.007</b>     | 0.64 | <b>0.001</b> | 0.16 | 0.15             | 0.17        | <b>0.01</b> | 0.31 | <b>&lt;0.001</b> | <b>&lt;0.001</b> | <b>0.07</b> |
| BMI (35% missing data)                             | <b>&lt;0.001</b> | <b>&lt;0.001</b> | <b>&lt;0.001</b> | 0.57 | 0.22         | 0.46 | <b>&lt;0.001</b> | <b>0.01</b> | 0.14        | 0.44 | <b>&lt;0.001</b> | <b>&lt;0.001</b> | 0.56        |

<sup>1</sup>One or more purchases of hypnotics, anxiolytics or antiepileptic drugs

<sup>2</sup>Entitlement to other chronic diseases (including any of the following: thyroid insufficiency, post-transplantation conditions, disseminated connective tissue diseases, including rheumatoid arthritis, chronic asthma and chronic obstructive pulmonary disease, chronic hypertension, inflammatory bowel disease).

**TABLE S2.** Distribution of diagnoses recorded in the Hospital Discharge Register in mothers in the SSRI group and in the *Psychiatric diagnosis, no medication* group.

| Diagnosis                                          | SSRI group with a diagnosis<br>N=4,811 |      | Psychiatric diagnosis, no medication group<br>N=9,652 |      |
|----------------------------------------------------|----------------------------------------|------|-------------------------------------------------------|------|
|                                                    | N                                      | %    | N                                                     | %    |
| Non-affective and undefined psychoses, N (%)       | 265                                    | 5.5  | 424                                                   | 4.4  |
| Bipolar disorder, N (%)                            | 269                                    | 5.6  | 321                                                   | 3.3  |
| Depression or undefined affective disorders, N (%) | 3,233                                  | 67.2 | 4,069                                                 | 42.2 |
| Anxiety and other emotional disorders, N (%)       | 2,382                                  | 49.5 | 6,136                                                 | 63.6 |

Because of comorbidity, the numbers and percentages in columns exceed the total number.

Non-affective and undefined psychoses: ICD-10: F20-29; ICD-9: 295, 297, 298

Bipolar disorder: ICD-10: F30-F31; ICD-9: 2962, 2963, 2964, 2967A

Depression or undefined affective disorders: ICD-10: F32-F39; ICD-9: 2961, 2968A, 3004A

Anxiety and other emotional disorders: ICD 10: F40-F48; ICD-9: 300, excluding 3004A

**TABLE S3.** Comparisons of pregnancy and neonatal outcomes including pregnancies in women with two or more SSRI purchases (n=9,322) during pregnancy by exposure status.

| Outcome                                | SSRI group<br>vs.<br><i>Psychiatric diagnosis, no medication</i> group |                         | SSRI group<br>vs.<br><i>Unexposed</i> |                         |
|----------------------------------------|------------------------------------------------------------------------|-------------------------|---------------------------------------|-------------------------|
|                                        | Odds Ratio                                                             | 95% Confidence Interval | Odds Ratio                            | 95% Confidence Interval |
| Hypertension of pregnancy              | 1.16*                                                                  | 1.01-1.35               | 1.14*                                 | 1.01-1.29               |
| Caesarean section                      | 0.72***                                                                | 0.67-0.78               | 1.22***                               | 1.14-1.31               |
| Caesarean section, emergency or urgent | 0.90                                                                   | 0.81-1.01               | 1.08                                  | 0.98-1.19               |
| Bleeding during or after delivery      | 0.83*                                                                  | 0.70-0.98               | 1.09                                  | 0.94-1.26               |
| Preterm birth                          |                                                                        |                         |                                       |                         |
| 32-36 weeks                            | 0.85*                                                                  | 0.73-0.98               | 1.08                                  | 0.94-1.23               |
| <32 weeks                              | 0.53**                                                                 | 0.35-0.80               | 0.80                                  | 0.55-1.19               |
| Small for gestational age (SGA)        | 0.92                                                                   | 0.75-1.12               | 0.85                                  | 0.72-1.02               |
| Apgar 5 min <7                         | 2.14***                                                                | 1.68-2.73               | 2.16***                               | 1.81-2.58               |
| Neonatal breathing problems            | 1.63***                                                                | 1.39-1.91               | 1.85***                               | 1.63-2.11               |
| Neonatal (intensive) care unit         | 1.39***                                                                | 1.27-1.53               | 1.56***                               | 1.44-1.68               |
| In hospital at 7 days age              | 0.94                                                                   | 0.84-1.06               | 1.30***                               | 1.17-1.44               |
| Major congenital malformation          | 0.98                                                                   | 0.85-1.14               | 1.14*                                 | 1.01-1.30               |

\* p<0.05; \*\* p<0.01; \*\*\* p<0.001.

Adjusted for sex, birth period, maternal age at delivery, place of residence, marital status, parity, smoking, socio-economic status, purchase of anxiolytics, hypnotics and sedatives (ATC N05B, N05C) or antiepileptic drugs (N03), entitlement to pre-pregnancy diabetes, and entitlement to other chronic diseases (including any of the following: thyroid insufficiency, post-transplantation conditions, disseminated connective tissue diseases, including rheumatoid arthritis, chronic asthma and chronic obstructive pulmonary disease, chronic hypertension, inflammatory bowel disease).

**FIGURE S1.** Percentage of pregnant women purchasing individual SSRIs in Finland, 1996-2010

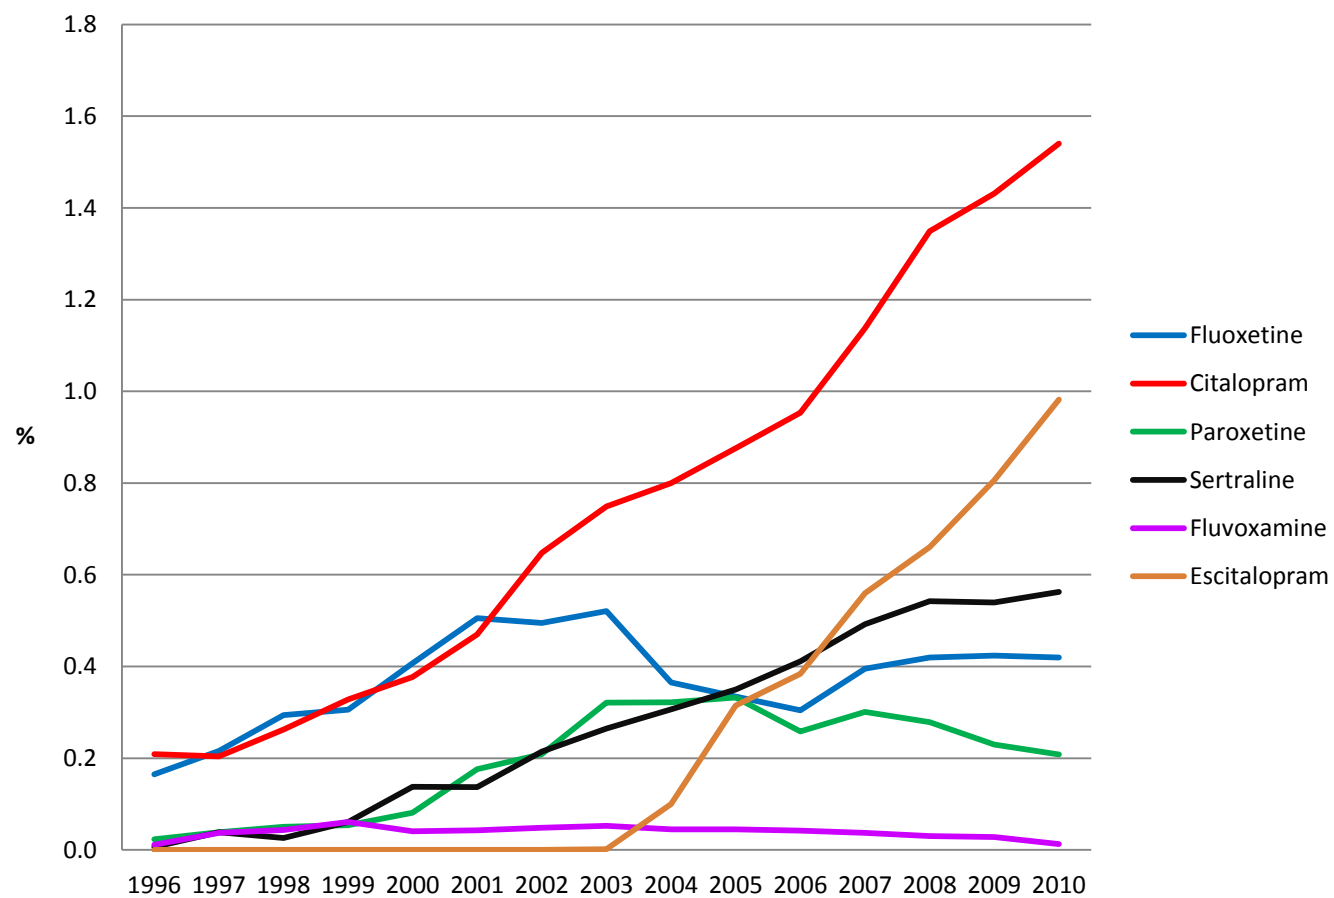

Supplement: appi.ajp.2015.14121575.ds001.pdf [file appi.ajp.2015.14121575.ds001.pdf]
